# Supplementary material
Source: Springer Nature journal article supplement (https://www.springermedizin.de/resource/supplementary/12943_2014_1376_MOESM2_ESM.pdf/9552842)

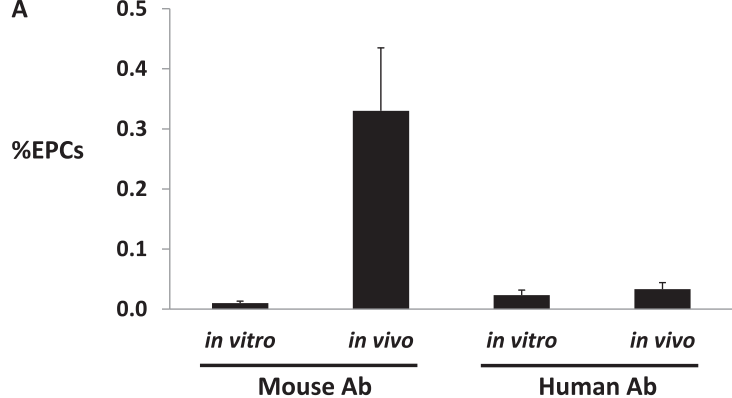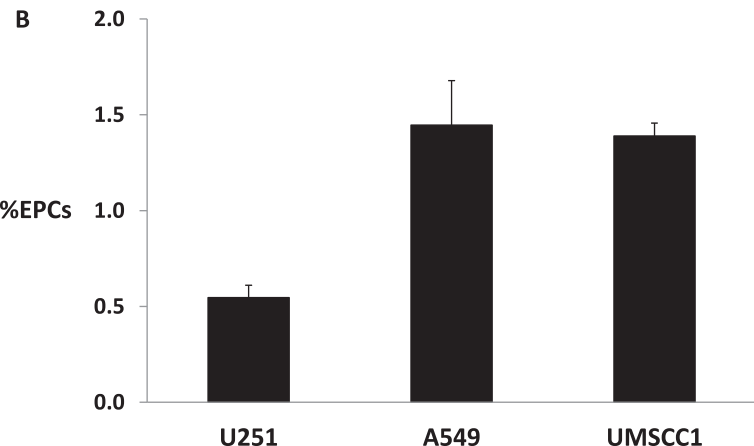

Supplement: MOESM2 [file 9552842]
